# Supplementary material
Source: publisher figshare collection journal article supplement (https://brill.figshare.com/ndownloader/files/20150858)
Supplement: Supplementary file 1 [file 20150858]

## Sheet: Sheet1
	Total estimated area (km2)
Scenario	B. cordobae	M. stelzneri	O. cordobae	O. achalensis	P. kriegi	R. achalensis
Current	25513.4	27392.6	83653.6	3070.71	2030.67	3187.35
INMCM4	9937.89	11962.1	110303	0	0	886.95
IPSL - CM54 -LR	5197.77	5212.35	46771.8	0	0	0
